# Supplementary material
Source: publisher figshare collection journal article supplement (https://frontiersin.figshare.com/ndownloader/files/30749215)
Supplement: Supplementary file [file 30749215]

**Table S3.** Association between PIMREG expression and tumor immune microenvironment in pan-cancer.

| Cancer type | Gene   | StromalScore | ImmuneScore |
|-------------|--------|--------------|-------------|
| ACC         | PIMREG | 0.063826062  | 0.311491814 |
| BLCA        | PIMREG | 0.013569699  | 0.002479455 |
| BRCA        | PIMREG | 0            | 0.6089586   |
| CESC        | PIMREG | 0.006842844  | 6.14E-06    |
| CHOL        | PIMREG | 0.021587221  | 0.037706166 |
| COAD        | PIMREG | 0.001738815  | 0.468416781 |
| DLBC        | PIMREG | 0.006032626  | 4.70E-06    |
| ESCA        | PIMREG | 0.239454992  | 2.12E-05    |
| GBM         | PIMREG | 2.02E-11     | 7.51E-11    |
| HNSC        | PIMREG | 4.65E-06     | 0.00457297  |
| KICH        | PIMREG | 0.433404647  | 0.104081894 |
| KIRC        | PIMREG | 5.36E-07     | 1.04E-11    |
| KIRP        | PIMREG | 0.238652057  | 0.031873085 |
| LAML        | PIMREG | 0.017360548  | 0.208616475 |
| LGG         | PIMREG | 0.267241701  | 0.109620422 |
| LIHC        | PIMREG | 0.607872957  | 0.001355649 |
| LUAD        | PIMREG | 1.79E-05     | 0.0005538   |
| LUSC        | PIMREG | 1.60E-13     | 1.72E-10    |
| MESO        | PIMREG | 0.035666355  | 0.473339307 |
| OV          | PIMREG | 0.007178643  | 0.000367384 |
| PAAD        | PIMREG | 0.001067924  | 0.00013091  |
| PCPG        | PIMREG | 0.126856528  | 0.77802999  |
| PRAD        | PIMREG | 0.300811717  | 0.326533367 |
| READ        | PIMREG | 0.003652002  | 0.518831549 |
| SARC        | PIMREG | 0.004830019  | 0.016281235 |
| SKCM        | PIMREG | 0.019371748  | 0.000112755 |
| STAD        | PIMREG | 4.79E-13     | 3.88E-08    |
| TGCT        | PIMREG | 0.0700452    | 5.91E-11    |
| THCA        | PIMREG | 6.26E-12     | 1.72E-15    |
| THYM        | PIMREG | 0.000163921  | 0.002784062 |
| UCEC        | PIMREG | 5.36E-08     | 2.83E-11    |
| UCS         | PIMREG | 0.562026054  | 0.068900999 |
| UVM         | PIMREG | 0.278763436  | 0.357813521 |
